# Supplementary material
Source: PubMed Central journal article supplement (PMC4465879)
Supplement: NIHMS682769-supplement-Supplement.pdf [file NIHMS682769-supplement-Supplement.pdf]

## Supplemental Material for: *Familial aggregation of arthritis-related diseases in seropositive and seronegative rheumatoid arthritis – a register-based case-control study in Sweden*

Thomas Frisell,<sup>1</sup> Karin Hellgren,<sup>1,2</sup> Lars Alfredsson,<sup>3</sup> Soumya Raychaudhuri,<sup>4-7</sup> Lars Klareskog,<sup>2</sup> Johan Askling<sup>1,2</sup>

1. Clinical Epidemiology Unit, Department of Medicine, Karolinska Institutet, Solna, Sweden
2. Rheumatology Unit, Department of Medicine, Karolinska Institutet, Solna, Sweden
3. *Institute of Environmental Medicine, Karolinska Institutet, Stockholm, Sweden*
4. Division of Rheumatology, Immunology, and Allergy, Brigham and Women's Hospital, Harvard Medical School, Boston, MA, USA.
5. Division of Genetics, Brigham and Women's Hospital, Harvard Medical School, Boston, MA, USA.
6. Program in Medical and Population Genetics, Broad Institute, Cambridge, MA, USA.
7. Arthritis Research UK Epidemiology Unit, Centre for Musculoskeletal Research, Institute of Inflammation and Repair, The University of Manchester, Manchester, UK

### **This supplemental material contains:**

Table S1: Validity of register-based RA serology

Table S2: Familial risks in siblings, offspring, and parents

Table S3: Familial risks by proband's sex

Figure S1: Venn diagram of RA cases ascertained from different data sources

Table S4: Descriptive statistics of the sample ascertained through the SRQ

Table S5: Replication of main findings using the SRQ

Table S6: Risk of RA associated with multiple affected relatives (Figure 2 in manuscript)

**Table S1.** Correspondence of RA serology in the NPR, the SRQ, and the EIRA study.

|               | Serology based on algorithm in NPR |      |      | Serology from diagnosis in SRQ |      |      | RF measured in EIRA |      |      | ACPA measured in EIRA |      |      |
|---------------|------------------------------------|------|------|--------------------------------|------|------|---------------------|------|------|-----------------------|------|------|
|               | N                                  | PPV  | NPV  | N                              | PPV  | NPV  | N                   | PPV  | NPV  | N                     | PPV  | NPV  |
| Diagnosis NPR | 60998                              | 1.00 | 1.00 | 24047                          | 0.87 | 0.90 | 2572                | 0.80 | 0.93 | 2582                  | 0.77 | 0.84 |
| Diagnosis SRQ | 24047                              | 0.98 | 0.57 | 25733                          | 1.00 | 1.00 | 2423                | 0.95 | 0.93 | 2435                  | 0.86 | 0.75 |
| RF EIRA       | 2572                               | 0.98 | 0.48 | 2423                           | 0.97 | 0.89 | 2822                | 1.00 | 1.00 | 2772                  | 0.85 | 0.75 |
| ACPA EIRA     | 2582                               | 0.96 | 0.43 | 2435                           | 0.88 | 0.72 | 2772                | 0.87 | 0.71 | 2829                  | 1.00 | 1.00 |

**Notes:** NPR, national patient register; SRQ, Swedish Rheumatology Quality of care register; PPV, row-wise positive predictive value; NPV, row-wise negative predictive value.

**Table S2.** Arthritis-related diseases in first degree relatives associated to proband's RA, by proband's serostatus and type of relative. RA probands ascertained through the NPR.

| Disease in FDR                 | Type of relative | Seropositive RA, OR (95% CI) | Seronegative RA, OR (95% CI) |
|--------------------------------|------------------|------------------------------|------------------------------|
| Seropositive RA                | Offspring        | 4.02 (3.60-4.48)             | 2.52 (2.06-3.08)             |
|                                | Parent           | 3.88 (3.51-4.28)             | 2.70 (2.26-3.22)             |
|                                | Sibling          | 4.06 (3.57-4.63)             | 2.25 (1.87-2.71)             |
| Seronegative RA                | Offspring        | 2.72 (2.29-3.24)             | 2.78 (2.03-3.80)             |
|                                | Parent           | 2.34 (1.95-2.81)             | 2.32 (1.72-3.13)             |
|                                | Sibling          | 2.33 (1.93-2.81)             | 3.36 (2.24-5.06)             |
| Juvenile idiopathic arthritis  | Offspring        | 3.80 (2.82-5.12)             | 5.04 (3.00-8.46)             |
|                                | Parent           | *                            | *                            |
|                                | Sibling          | 7.69 (3.12-18.95)            | 7.08 (2.02-24.82)            |
| Other inflammatory arthritis   | Offspring        | 1.65 (1.50-1.82)             | 1.76 (1.49-2.08)             |
|                                | Parent           | 1.42 (1.21-1.66)             | 1.41 (1.09-1.83)             |
|                                | Sibling          | 1.76 (1.55-2.00)             | 1.49 (1.18-1.88)             |
| Spondyloarthropathies          | Offspring        | 1.17 (1.11-1.23)             | 1.32 (1.21-1.44)             |
|                                | Parent           | 1.25 (1.15-1.37)             | 1.35 (1.17-1.56)             |
|                                | Sibling          | 1.20 (1.12-1.28)             | 1.33 (1.19-1.49)             |
| Psoriasis/ Psoriatic arthritis | Offspring        | 1.20 (1.12-1.29)             | 1.48 (1.33-1.66)             |
|                                | Parent           | 1.20 (1.07-1.34)             | 1.25 (1.05-1.49)             |
|                                | Sibling          | 1.24 (1.14-1.34)             | 1.41 (1.22-1.62)             |
| Lupus                          | Offspring        | 1.73 (1.38-2.17)             | 1.26 (0.80-1.96)             |
|                                | Parent           | 1.98 (1.37-2.86)             | 2.44 (1.42-4.20)             |
|                                | Sibling          | 2.04 (1.59-2.62)             | 2.02 (1.18-3.48)             |
| Connective tissue diseases     | Offspring        | 2.15 (1.76-2.64)             | 1.66 (1.16-2.37)             |
|                                | Parent           | 2.08 (1.66-2.60)             | 1.63 (1.09-2.43)             |
|                                | Sibling          | 1.86 (1.54-2.24)             | 2.00 (1.40-2.85)             |
| Arthralgia                     | Offspring        | 1.34 (1.27-1.41)             | 1.29 (1.17-1.43)             |
|                                | Parent           | 1.05 (0.92-1.20)             | 1.17 (0.96-1.44)             |
|                                | Sibling          | 1.08 (0.99-1.19)             | 1.24 (1.06-1.44)             |
| Osteoarthritis                 | Offspring        | 1.05 (1.00-1.11)             | 1.10 (1.01-1.19)             |
|                                | Parent           | 0.96 (0.91-1.01)             | 0.96 (0.89-1.05)             |
|                                | Sibling          | 1.02 (0.98-1.07)             | 1.07 (0.99-1.17)             |

**Notes:** \*: Not possible to compute due to sparse data.

**Table S3.** Arthritis-related diseases in first degree relatives associated to proband's RA, by proband's serostatus and sex. RA probands ascertained through the NPR.

| Disease in FDR                | Data source | Female                       |                              |                       | Male                         |                              |                       |
|-------------------------------|-------------|------------------------------|------------------------------|-----------------------|------------------------------|------------------------------|-----------------------|
|                               |             | Seropositive RA, OR (95% CI) | Seronegative RA, OR (95% CI) | Ratio of ORs (95% CI) | Seropositive RA, OR (95% CI) | Seronegative RA, OR (95% CI) | Ratio of ORs (95% CI) |
| Seropositive RA               | NPR         | 3.90 (3.65-4.18)             | 2.48 (2.19-2.79)             | 1.58 (1.37-1.81)      | 4.08 (3.65-4.56)             | 2.35 (1.94-2.86)             | 1.73 (1.38-2.17)      |
|                               | SRQ         | 4.11 (3.73-4.53)             | 2.68 (2.27-3.18)             | 1.53 (1.26-1.86)      | 4.14 (3.51-4.89)             | 2.44 (1.87-3.19)             | 1.70 (1.24-2.33)      |
| Seronegative RA               | NPR         | 2.38 (2.12-2.66)             | 2.69 (2.18-3.31)             | 0.88 (0.70-1.12)      | 2.76 (2.28-3.35)             | 3.14 (2.27-4.33)             | 0.88 (0.61-1.28)      |
|                               | SRQ         | 2.34 (2.00-2.75)             | 2.77 (2.03-3.78)             | 0.85 (0.60-1.20)      | 2.64 (1.98-3.53)             | 2.81 (1.78-4.44)             | 0.94 (0.55-1.61)      |
| Juvenile idiopathic arthritis | NPR         | 3.99 (2.91-5.47)             | 6.47 (3.47-12.06)            | 0.62 (0.31-1.24)      | 3.92 (2.15-7.14)             | 4.02 (1.75-9.22)             | 0.97 (0.35-2.72)      |
|                               | SRQ         | 2.51 (1.59-3.97)             | 5.10 (2.44-10.64)            | 0.49 (0.21-1.17)      | 3.76 (1.73-8.16)             | 3.25 (1.37-7.74)             | 1.15 (0.36-3.70)      |
| Other infl. arthritis         | NPR         | 1.69 (1.57-1.82)             | 1.60 (1.39-1.84)             | 1.06 (0.90-1.24)      | 1.44 (1.27-1.64)             | 1.41 (1.14-1.74)             | 1.03 (0.80-1.31)      |
|                               | SRQ         | 1.45 (1.29-1.63)             | 1.58 (1.30-1.92)             | 0.92 (0.73-1.15)      | 1.40 (1.16-1.69)             | 1.19 (0.87-1.63)             | 1.17 (0.82-1.69)      |
| Spondyloarthropathies         | NPR         | 1.21 (1.16-1.26)             | 1.30 (1.21-1.39)             | 0.93 (0.86-1.01)      | 1.18 (1.10-1.27)             | 1.35 (1.20-1.50)             | 0.88 (0.77-1.00)      |
|                               | SRQ         | 1.17 (1.10-1.24)             | 1.22 (1.10-1.36)             | 0.95 (0.84-1.08)      | 1.17 (1.05-1.29)             | 1.18 (1.00-1.40)             | 0.99 (0.81-1.20)      |
| Psoriasis/Psoriatic arthritis | NPR         | 1.24 (1.17-1.31)             | 1.40 (1.28-1.53)             | 0.89 (0.80-0.98)      | 1.21 (1.11-1.32)             | 1.40 (1.21-1.60)             | 0.87 (0.73-1.02)      |
|                               | SRQ         | 1.16 (1.07-1.26)             | 1.41 (1.24-1.61)             | 0.82 (0.71-0.96)      | 1.13 (0.98-1.29)             | 1.07 (0.87-1.32)             | 1.05 (0.82-1.35)      |
| Lupus                         | NPR         | 2.05 (1.71-2.44)             | 1.45 (1.03-2.05)             | 1.41 (0.96-2.08)      | 1.73 (1.30-2.31)             | 2.87 (1.74-4.72)             | 0.60 (0.34-1.07)      |
|                               | SRQ         | 1.99 (1.53-2.59)             | 1.76 (1.11-2.79)             | 1.13 (0.67-1.92)      | 2.07 (1.36-3.17)             | 2.23 (1.17-4.26)             | 0.93 (0.43-2.01)      |
| Connective tissue diseases    | NPR         | 2.08 (1.83-2.37)             | 1.67 (1.29-2.15)             | 1.25 (0.94-1.66)      | 1.92 (1.55-2.38)             | 1.98 (1.39-2.82)             | 0.97 (0.64-1.47)      |
|                               | SRQ         | 1.82 (1.50-2.21)             | 1.19 (0.80-1.77)             | 1.53 (0.99-2.36)      | 2.05 (1.49-2.83)             | 1.73 (0.98-3.05)             | 1.19 (0.62-2.28)      |
| Arthralgia                    | NPR         | 1.26 (1.20-1.32)             | 1.33 (1.22-1.45)             | 0.94 (0.86-1.04)      | 1.17 (1.07-1.26)             | 1.09 (0.94-1.25)             | 1.07 (0.91-1.26)      |
|                               | SRQ         | 1.20 (1.11-1.29)             | 1.31 (1.16-1.47)             | 0.92 (0.80-1.05)      | 1.19 (1.06-1.34)             | 1.05 (0.87-1.26)             | 1.14 (0.91-1.42)      |
| Osteoarthritis                | NPR         | 1.03 (1.00-1.06)             | 1.06 (1.00-1.11)             | 0.97 (0.92-1.04)      | 1.02 (0.97-1.08)             | 1.02 (0.94-1.11)             | 1.00 (0.91-1.11)      |
|                               | SRQ         | 1.03 (0.99-1.08)             | 1.09 (1.01-1.17)             | 0.95 (0.87-1.04)      | 1.00 (0.93-1.08)             | 1.07 (0.95-1.21)             | 0.93 (0.81-1.08)      |

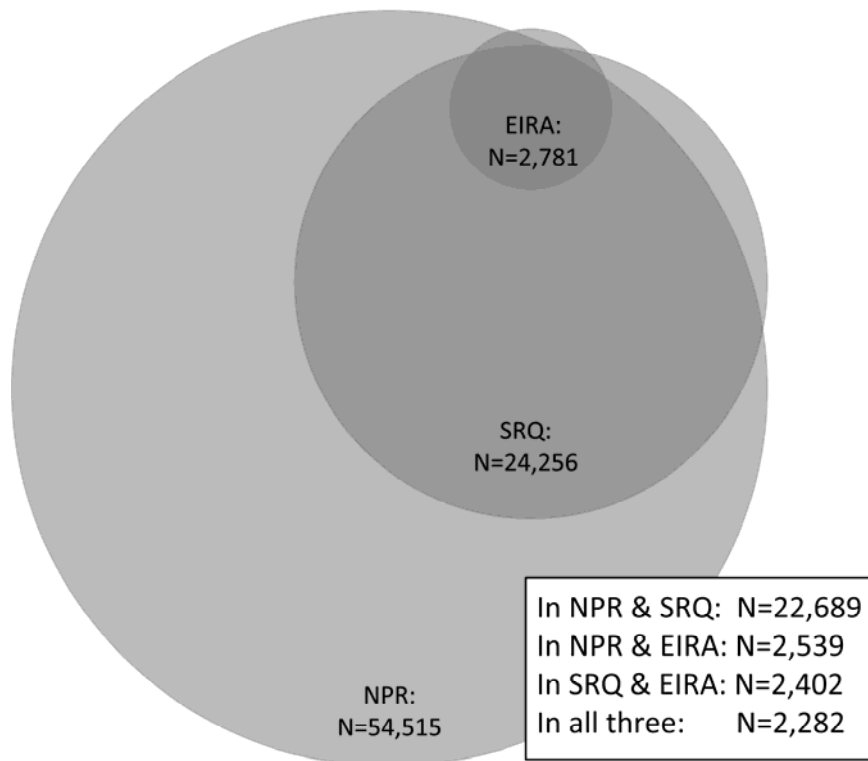

Figure S1. Venn diagram of RA cases retrieved from the National Patient Register (NPR), the Swedish Rheumatology's Quality of Care Register (SRQ), and the Epidemiological Investigation of Rheumatoid Arthritis (EIRA) case-control study.

**Table S4. Descriptive statistics of RA cases ascertained through the Swedish Rheumatology Quality of Care Register, their matched controls, and index individuals' first degree relatives.**

| Index individuals:                                      | Seropositive RA  |                  | Seronegative RA  |                  |
|---------------------------------------------------------|------------------|------------------|------------------|------------------|
|                                                         | Cases            | Controls         | Cases            | Controls         |
| N                                                       | 17968            | 86404            | 6288             | 30440            |
| Male, %                                                 | 27.4%            | 27.2%            | 30.6%            | 30.4%            |
| Age at inclusion, yrs,<br>median (1st -3rd<br>quartile) | 60 (50-68)       | 59 (50-68)       | 60 (49-70)       | 60 (49-70)       |
| <b>First degree relatives:</b>                          |                  |                  |                  |                  |
| N                                                       | 71183            | 347149           | 24785            | 120182           |
| Male, %                                                 | 50.9%            | 51.5%            | 51.0%            | 51.8%            |
| Birth year, median<br>(1st-3rd quartile)                | 1969 (1958-1980) | 1970 (1960-1982) | 1969 (1957-1982) | 1969 (1958-1983) |
| Seropositive RA                                         | 1618 (2.27%)     | 1944 (0.56%)     | 352 (1.42%)      | 679 (0.56%)      |
| Seronegative RA                                         | 333 (0.47%)      | 680 (0.20%)      | 121 (0.49%)      | 210 (0.17%)      |
| Juvenile idiopathic<br>arthritis                        | 45 (0.06%)       | 84 (0.02%)       | 29 (0.12%)       | 30 (0.02%)       |
| Other inflammatory<br>arthritis                         | 548 (0.77%)      | 1888 (0.54%)     | 203 (0.82%)      | 675 (0.56%)      |
| Spondyloarthropathies                                   | 1985 (2.79%)     | 8268 (2.38%)     | 697 (2.81%)      | 2791 (2.32%)     |
| Psoriasis/ psoriatic<br>arthritis                       | 1141 (1.60%)     | 4805 (1.38%)     | 458 (1.85%)      | 1713 (1.43%)     |
| Lupus                                                   | 123 (0.17%)      | 304 (0.09%)      | 39 (0.16%)       | 104 (0.09%)      |
| Connective tissue<br>diseases                           | 215 (0.30%)      | 549 (0.16%)      | 51 (0.21%)       | 188 (0.16%)      |
| Arthralgia                                              | 1337 (1.88%)     | 5496 (1.58%)     | 523 (2.11%)      | 2053 (1.71%)     |
| Osteoarthritis                                          | 3794 (5.33%)     | 18089 (5.21%)    | 1397 (5.64%)     | 6215 (5.17%)     |

**Table S5. Arthritis-related diseases in first degree relatives associated to proband's RA, by proband's serostatus. Cases ascertained through the Swedish Rheumatology Quality of Care Register.**

| Disease in relative               | Seropositive<br>RA, OR (95% CI) | Seronegative RA,<br>OR (95% CI) | Ratio of ORs<br>(95% CI) |
|-----------------------------------|---------------------------------|---------------------------------|--------------------------|
| Seropositive RA                   | 4.12 (3.79-4.49)                | 2.61 (2.26-3.01)                | 1.58 (1.34-1.87)         |
| Seronegative RA                   | 2.41 (2.10-2.77)                | 2.78 (2.15-3.60)                | 0.87 (0.65-1.16)         |
| Juvenile idiopathic<br>arthritis  | 2.78 (1.88-4.10)                | 4.54 (2.53-8.14)                | 0.61 (0.30-1.24)         |
| Other infl. arthritis             | 1.44 (1.30-1.59)                | 1.46 (1.24-1.72)                | 0.99 (0.81-1.19)         |
| Spondyloarthropathies             | 1.17 (1.11-1.23)                | 1.21 (1.11-1.32)                | 0.96 (0.87-1.07)         |
| Psoriasis/<br>psoriatic arthritis | 1.15 (1.08-1.24)                | 1.31 (1.17-1.46)                | 0.88 (0.77-1.01)         |
| Lupus                             | 2.01 (1.61-2.52)                | 1.90 (1.31-2.77)                | 1.06 (0.69-1.63)         |
| Connective tissue<br>diseases     | 1.88 (1.59-2.22)                | 1.34 (0.97-1.85)                | 1.41 (0.98-2.02)         |
| Arthralgia                        | 1.20 (1.12-1.27)                | 1.22 (1.11-1.35)                | 0.98 (0.87-1.10)         |
| Osteoarthritis                    | 1.02 (0.99-1.06)                | 1.08 (1.02-1.15)                | 0.95 (0.88-1.02)         |

**Table S6. Odds ratios (95% CI) for combinations of arthritis-related disease in first degree relatives associated to proband's RA ascertained through the NPR, by serostatus.**

| Disease in FDR:               | Seropositive RA in proband                                    |                                                               |                             | Seronegative RA in proband                                    |                                                               |                             |
|-------------------------------|---------------------------------------------------------------|---------------------------------------------------------------|-----------------------------|---------------------------------------------------------------|---------------------------------------------------------------|-----------------------------|
|                               | FDR with seropositive RA and a second FDR with disease in row | FDR with seronegative RA and a second FDR with disease in row | 2+ FDRs with disease in row | FDR with seropositive RA and a second FDR with disease in row | FDR with seronegative RA and a second FDR with disease in row | 2+ FDRs with disease in row |
| Seropositive RA               | 8.92 (6.97-11.42)                                             | 6.63 (4.65-9.44)                                              | 8.92 (6.97-11.42)           | 4.10 (2.65-6.34)                                              | 6.47 (3.36-12.45)                                             | 4.10 (2.65-6.34)            |
| Seronegative RA               | 6.63 (4.65-9.44)                                              | 4.88 (1.93-12.31)                                             | 4.88 (1.93-12.31)           | 6.47 (3.36-12.45)                                             | 1.67 (0.17-16.02)                                             | 1.67 (0.17-16.02)           |
| JIA                           | 9.86 (3.26-29.77)                                             | 6.45 (1.47-28.32)                                             | 17.41 (3.46-87.67)          | 11.17 (2.93-42.57)                                            | *                                                             | 7.46 (1.25-44.56)           |
| Other infl. arthritis         | 4.88 (3.61-6.59)                                              | 2.58 (1.46-4.58)                                              | 3.10 (2.02-4.77)            | 2.35 (1.37-4.03)                                              | 5.13 (2.42-10.87)                                             | 3.20 (1.33-7.74)            |
| Spondyloarthropathies         | 3.87 (3.42-4.38)                                              | 2.73 (2.20-3.39)                                              | 1.43 (1.26-1.62)            | 2.79 (2.22-3.52)                                              | 2.61 (1.82-3.76)                                              | 1.45 (1.17-1.80)            |
| Psoriasis/psoriatic arthritis | 3.62 (3.10-4.23)                                              | 3.03 (2.39-3.84)                                              | 1.41 (1.19-1.67)            | 3.24 (2.47-4.26)                                              | 2.49 (1.55-4.00)                                              | 1.58 (1.18-2.11)            |
| Lupus                         | 3.39 (2.29-5.04)                                              | 2.40 (1.16-4.97)                                              | 1.47 (0.40-5.39)            | 2.36 (0.99-5.67)                                              | 1.50 (0.49-4.56)                                              | 1.57 (0.16-15.71)           |
| Connective tissue diseases    | 3.50 (2.74-4.49)                                              | 3.66 (2.25-5.95)                                              | 4.04 (1.59-10.27)           | 2.68 (1.74-4.13)                                              | 2.06 (0.94-4.51)                                              | 9.65 (1.80-51.78)           |
| Arthralgia                    | 3.57 (2.93-4.35)                                              | 3.47 (2.52-4.76)                                              | 1.27 (1.04-1.56)            | 2.73 (1.95-3.82)                                              | 2.73 (1.47-5.05)                                              | 1.80 (1.30-2.49)            |
| Osteoarthritis                | 3.67 (3.23-4.17)                                              | 2.32 (1.88-2.86)                                              | 1.06 (0.99-1.15)            | 2.33 (1.87-2.89)                                              | 2.69 (1.79-4.05)                                              | 1.13 (1.00-1.28)            |

**Notes:** FDR: first degree relative. JIA: Juvenile idiopathic arthritis. \*: Not possible to compute.
